# Supplementary material for: Prediction of "hot spots" of aggregation in disease-linked polypeptides
Source: Springer Nature journal article supplement (doi:10.1186/1472-6807-5-18), 2005-09-30

# Amyloid- $\beta$ -protein

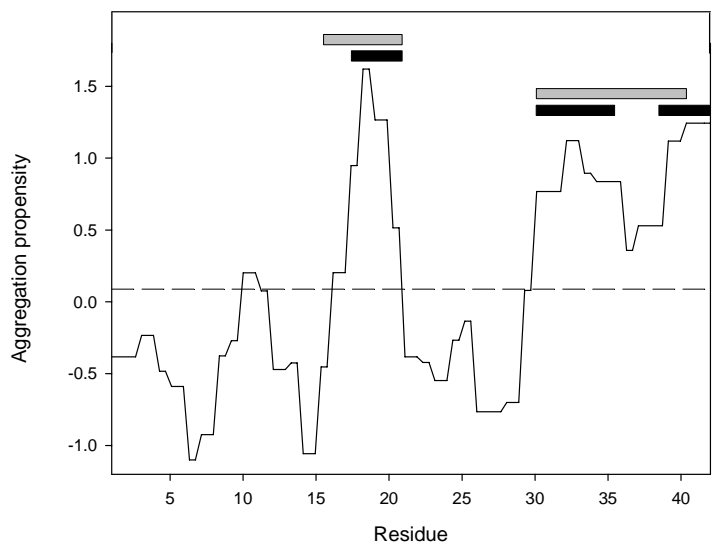

# Islet amyloid polypeptide

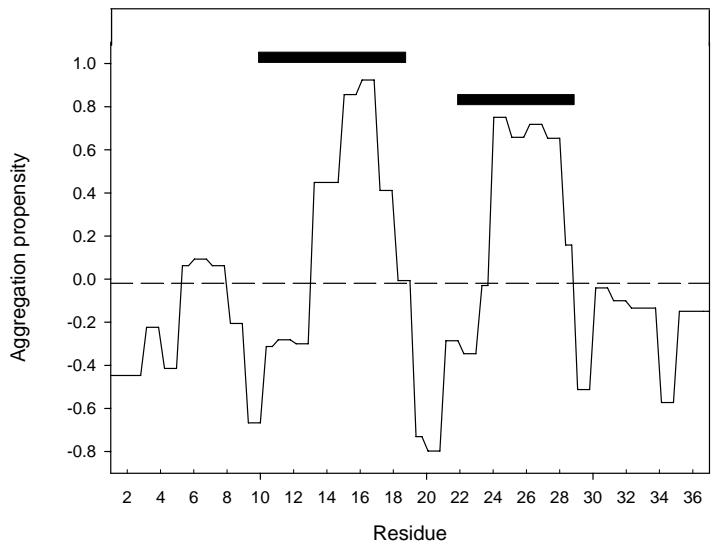

# $\alpha$ -Synuclein

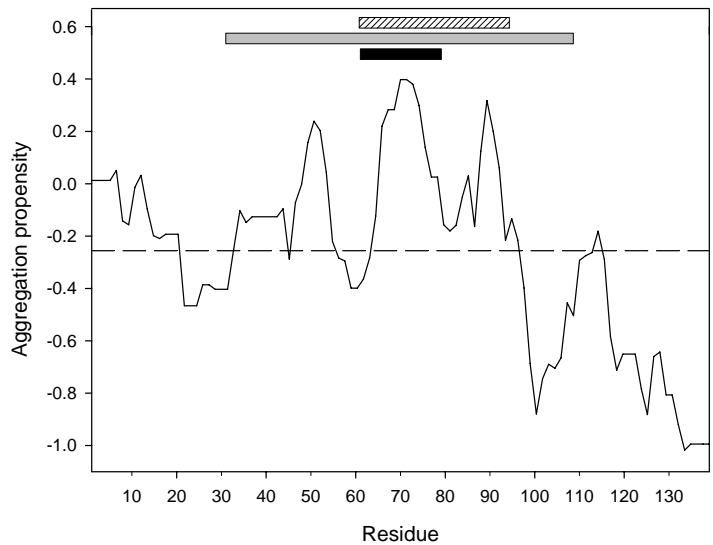

Supplement: 12900_2005_51_MOESM1_ESM.pdf [file 12900_2005_51_MOESM1_ESM.pdf]
