# Supplementary material for: Prediction of "hot spots" of aggregation in disease-linked polypeptides
Source: Springer Nature journal article supplement (doi:10.1186/1472-6807-5-18), 2005-09-30

### $\beta$ 2-microglobulin

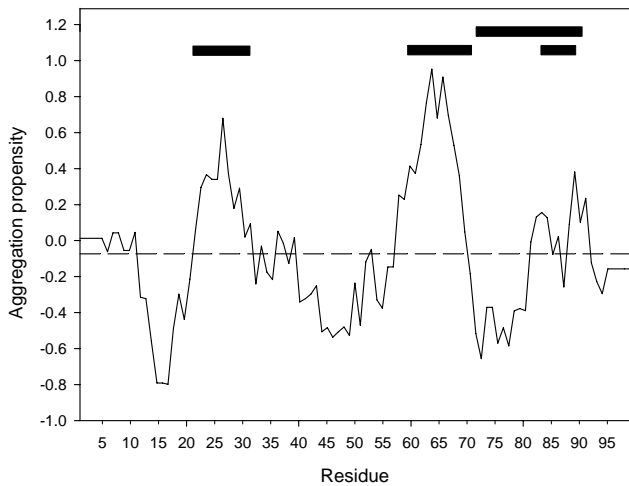

### Human Lysozyme (dashed)

### Hen Lysozyme (solid)

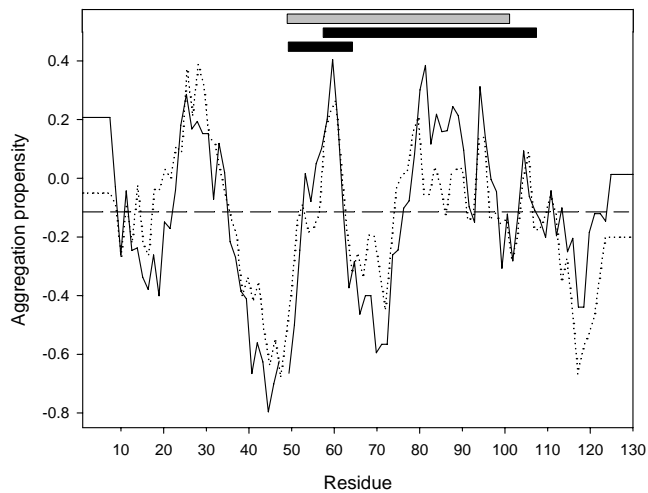

### Transthyretin

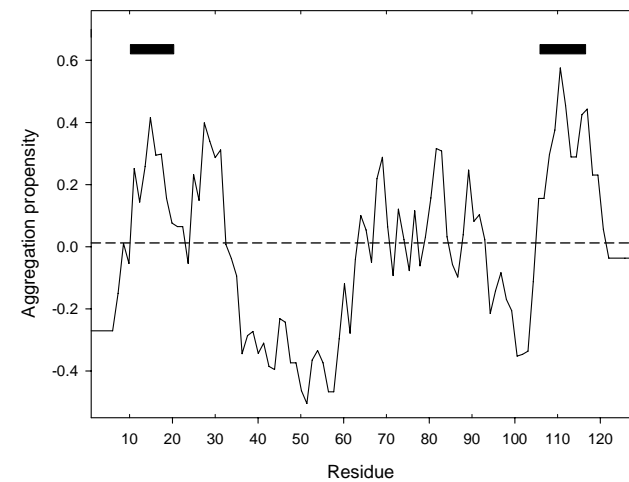

### Prion protein

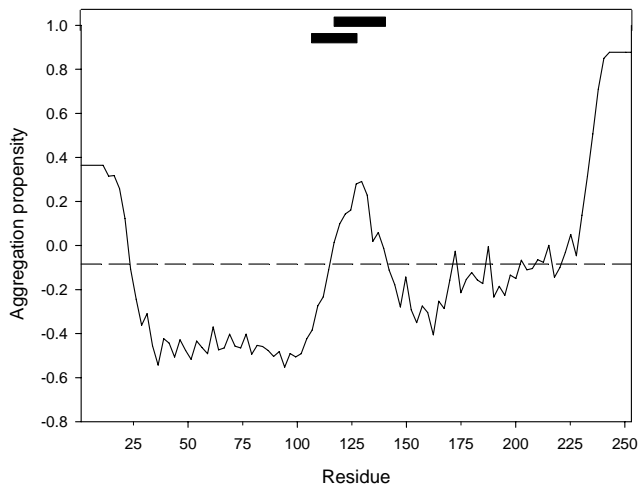

Supplement: 12900_2005_51_MOESM3_ESM.pdf [file 12900_2005_51_MOESM3_ESM.pdf]
